# Supplementary material for: A suite of 19F based relaxation dispersion experiments to assess biomolecular motions
Source: PubMed Central journal article supplement (PMC7701166; doi:10.1007/s10858-020-00348-4), 2020-09-30
Supplement: 10858_2020_348_MOESM1_ESM.pdf [file 10858_2020_348_MOESM1_ESM.pdf]

## Supporting information

*Title:*

**A suite of  $^{19}\text{F}$  based relaxation dispersion experiments to assess biomolecular motions.**

*Authors:*

Jan H. Overbeck<sup>1</sup>, Werner Kremer<sup>1</sup> & Remco Sprangers<sup>1</sup>

<sup>1</sup> Department of Biophysics I, Regensburg Center for Biochemistry, University of Regensburg, 93053 Regensburg, Germany.

Correspondence can be sent to: Remco Sprangers, Department of Biophysics I, Regensburg Center for Biochemistry, University of Regensburg, 93053 Regensburg, Germany.

E-mail: [remco.sprangers@ur.de](mailto:remco.sprangers@ur.de)

Journal of Biomolecular NMR

<https://doi.org/10.1007/s10858-020-00348-4>

| <b>Content</b>                                                                                  | <b>Page</b> |
|-------------------------------------------------------------------------------------------------|-------------|
| Supplementary Table 1: Parameters of chemical exchange for TmCsp                                | S3          |
| Supplementary Table 2: Parameters of chemical exchange for the $\alpha7\alpha7$ half-proteasome | S4          |
| Figure S1: $^{19}\text{F}$ CPMG experiment                                                      | S5          |
| Figure S2: Monte Carlo simulation for CPMG experiments                                          | S6          |
| Figure S3: Monte Carlo simulation for on-resonance R1 $\rho$ experiments                        | S7          |
| Figure S4: Monte Carlo simulation for off-resonance R1 $\rho$ experiments                       | S8          |
| Figure S5: Monte Carlo simulation for a global fit of all RD experiments                        | S9          |
| Figure S6: Global fit of CPMG, on-resonance R1 $\rho$ and off-resonance R1 $\rho$ experiments   | S10         |
| Figure S7: Comparison of on-resonance R1 $\rho$ data                                            | S11         |
| Figure S8: $^{19}\text{F}$ CPMG experiment for BTFA-labeled 35C mutant of the half-proteasome   | S12         |
| CPMG pulse sequence                                                                             | S13         |
| R1rho on-resonance pulse sequence                                                               | S17         |
| R1rho off-resonance pulse sequence                                                              | S20         |

**Supplementary Table 1** Parameters of chemical exchange for TmCsp

|                                  | $p_F$ [%]      | $k_{ex}$ [ $s^{-1}$ ] | $ \Delta\omega_w $ [ppm] | $ \Delta\omega_{w29} $ [ppm] | $R_2^{w7}$ [ $s^{-1}$ ]                                 | $R_2^{w29}$ [ $s^{-1}$ ]                              | $R_1^{w7}$ [ $s^{-1}$ ] | $R_1^{w29}$ [ $s^{-1}$ ] |
|----------------------------------|----------------|-----------------------|--------------------------|------------------------------|---------------------------------------------------------|-------------------------------------------------------|-------------------------|--------------------------|
| CPMG                             | 95.2 $\pm$ 0.1 | 1966 $\pm$ 485        | 2.46 $\pm$ 0.27          | 0.47 $\pm$ 0.05              | 10.7 $\pm$ 1.6                                          | 7.2 $\pm$ 0.6                                         | -                       | -                        |
| $R_{1\rho}$ on-resonance         | 96.6 $\pm$ 0.4 | 2286 $\pm$ 268        | 2.62 $\pm$ 0.18          | 0.51 $\pm$ 0.02              | 11.2 $\pm$ 0.7                                          | 8.6 $\pm$ 0.2                                         | -                       | -                        |
| $R_{1\rho}$ 100 Hz off-resonance | 94.3 $\pm$ 0.3 | 1818 $\pm$ 280        | -2.33 $\pm$ 0.55*        | -                            | 1.4 $\pm$ 16.7                                          | -                                                     | 1.5 $\pm$ 0.2           | -                        |
| $R_{1\rho}$ 200 Hz off-resonance | 94.7 $\pm$ 0.3 | 1544 $\pm$ 219        | -2.25 $\pm$ 0.30*        | -                            | 18.9 $\pm$ 11.3                                         | -                                                     | 1.9 $\pm$ 0.3           | -                        |
| $R_{1\rho}$ 300 Hz off-resonance | 94.8 $\pm$ 0.5 | 1795 $\pm$ 395        | -2.31 $\pm$ 0.37*        | -                            | 12.1 $\pm$ 16.6                                         | -                                                     | 1.9 $\pm$ 0.5           | -                        |
| $R_{1\rho}$ 400 Hz off-resonance | 87.0 $\pm$ 7.4 | 724 $\pm$ 461         | -2.37 $\pm$ 0.53*        | -                            | 37.7 $\pm$ 8.8                                          | -                                                     | 0.8 $\pm$ 0.4           | -                        |
| $R_{1\rho}$ off-resonance (all)  | 95.0 $\pm$ 0.2 | 1922 $\pm$ 137        | -2.33 $\pm$ 0.18*        | -                            | 7.5 $\pm$ 4.6                                           | -                                                     | 1.8 $\pm$ 0.2           | -                        |
| Global fit (CPMG + $R_{1\rho}$ ) | 94.8 $\pm$ 0.1 | 1737 $\pm$ 54         | -2.31 $\pm$ 0.14*        | 0.43 $\pm$ 0.01              | 11.5 $\pm$ 1.7 (CPMG)<br>10.9 $\pm$ 0.9 ( $R_{1\rho}$ ) | 7.4 $\pm$ 0.1 (CPMG)<br>8.7 $\pm$ 0.2 ( $R_{1\rho}$ ) | 1.9 $\pm$ 0.1           |                          |
| T1 (Inversion Recovery)          | -              | -                     | -                        | -                            | -                                                       | -                                                     | 1.53                    | 1.22                     |

\* For these values the sign of the chemical shift difference has been determined.

**Supplementary Table 2** Parameters of chemical exchange for the  $\alpha 7\alpha 7$  half-proteasome

|       | $p_A$ [%]      | $k_{ex}$ [ $s^{-1}$ ] | $ \Delta\omega $ [ppm] | $R_2^{18C}$ [ $s^{-1}$ ] (CPMG) | $R_2^{18C}$ [ $s^{-1}$ ] ( $R_{ip}$ ) |
|-------|----------------|-----------------------|------------------------|---------------------------------|---------------------------------------|
| 293 K | $94.1 \pm 1.4$ | $8314 \pm 1153$       | $0.57 \pm 0.08$        | $234.0 \pm 0.8$                 | $250.1 \pm 0.6$                       |
| 303 K | $96.7 \pm 0.7$ | $4102 \pm 366$        |                        | $170.8 \pm 0.5$                 | $174.8 \pm 0.4$                       |
| 313 K | $97.3 \pm 0.4$ | $1767 \pm 281$        |                        | $130.3 \pm 0.5$                 | $124.6 \pm 0.6$                       |
| 323 K | $97.6 \pm 0.3$ | $1503 \pm 215$        |                        | $90.0 \pm 0.4$                  | $90.5 \pm 0.2$                        |

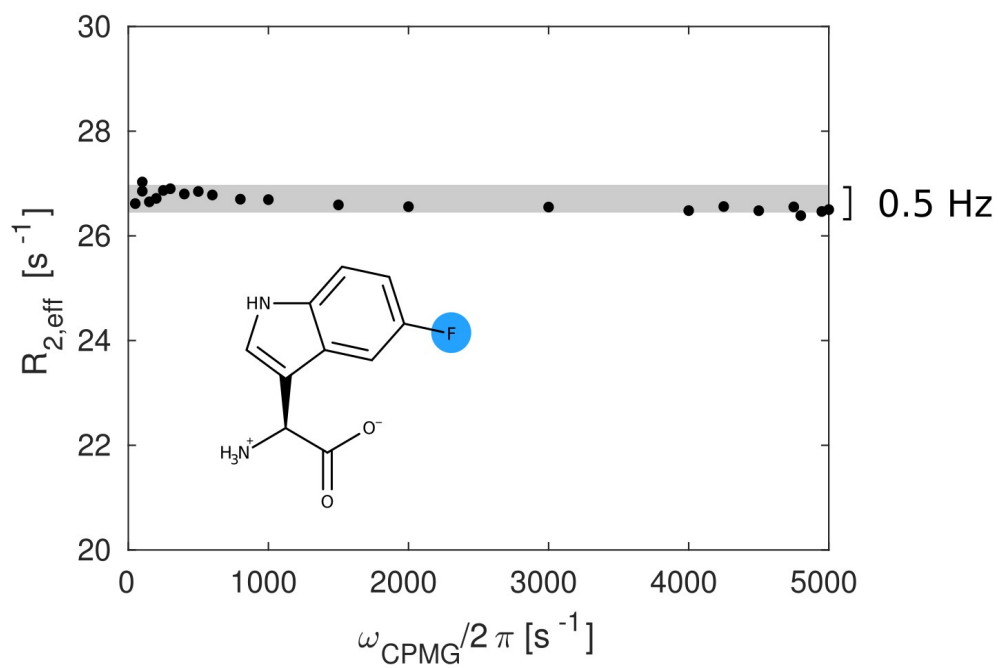

**Figure S1:**  $^{19}\text{F}$  CPMG experiment CPMG experiment of 5-fluoroindole in glycerol at 298 K

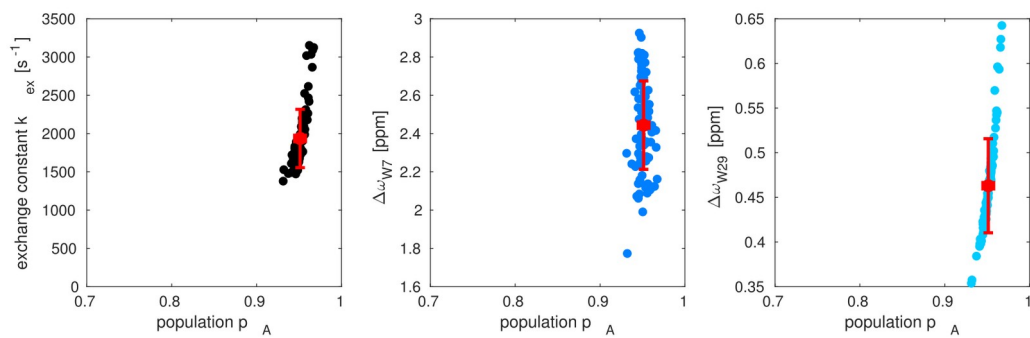

**Figure S2:** Monte Carlo simulation for CPMG experiments of 5FW-labeled TmCsp at 344 K at 500 MHz

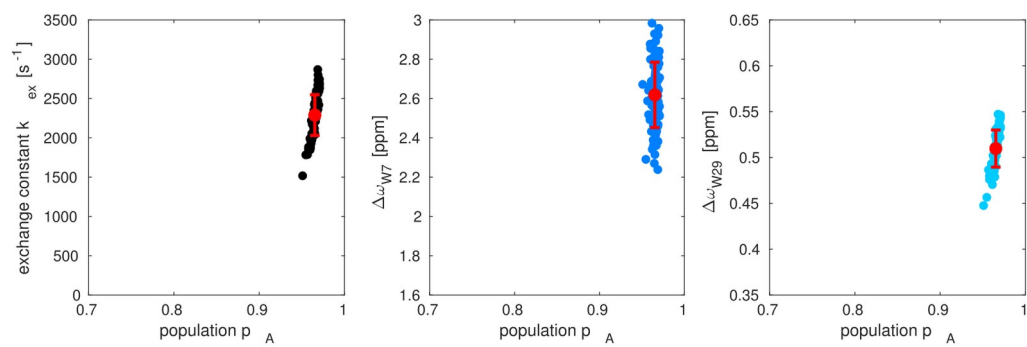

**Figure S3:** Monte Carlo simulation for on-resonance  $R_{1\rho}$  experiments of 5FW-labeled TmCsp at 344 K at 500 MHz

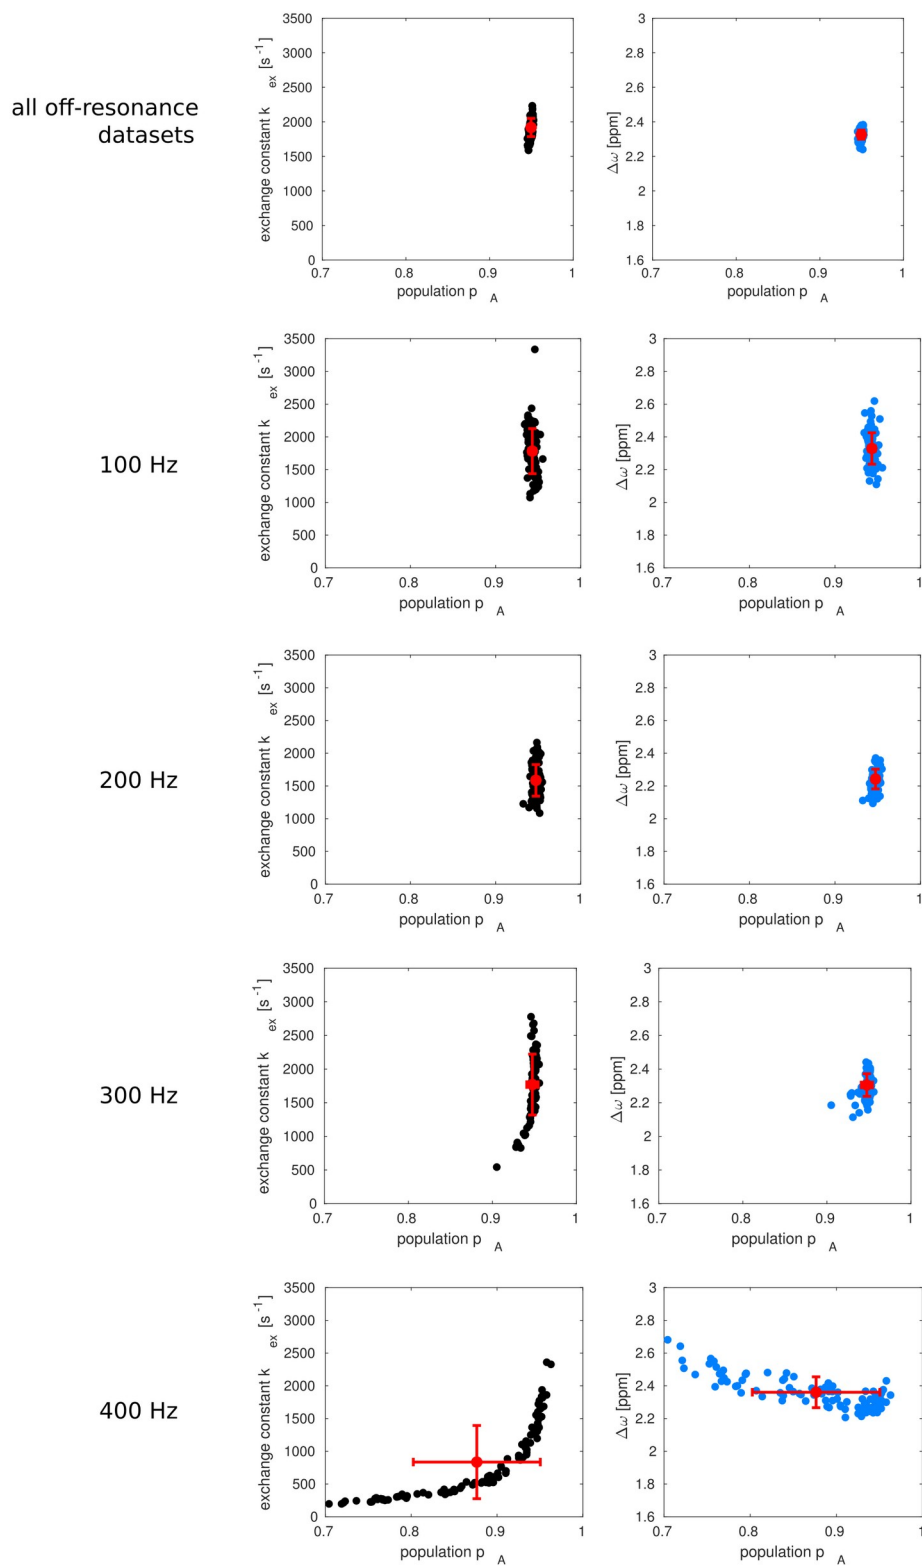

**Figure S4:** Monte Carlo simulation for off-resonance  $R_{1p}$  experiments of 5FW-labeled TmCsp at 344 K and spin lock powers of 100 Hz, 200 Hz, 300 Hz and 400 Hz at 500 MHz.



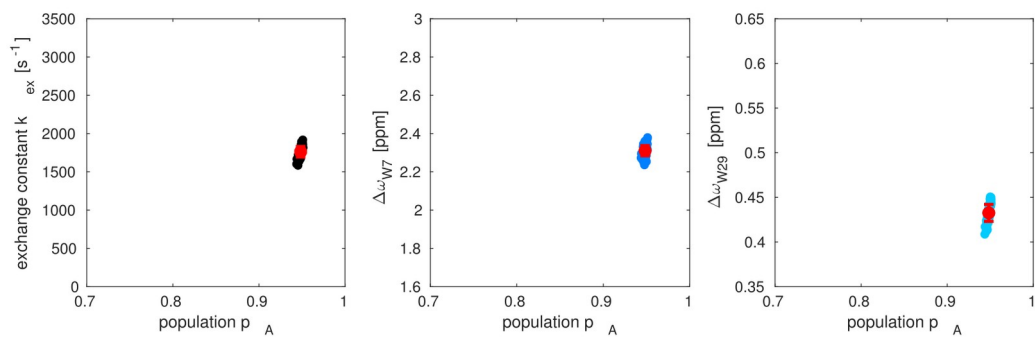

**Figure S5:** Monte Carlo simulation for global fit of CPMG, on-resonance  $R_{1\rho}$  and off-resonance  $R_{1\rho}$  experiments of 5FW-labeled TmCsp at 344 K.

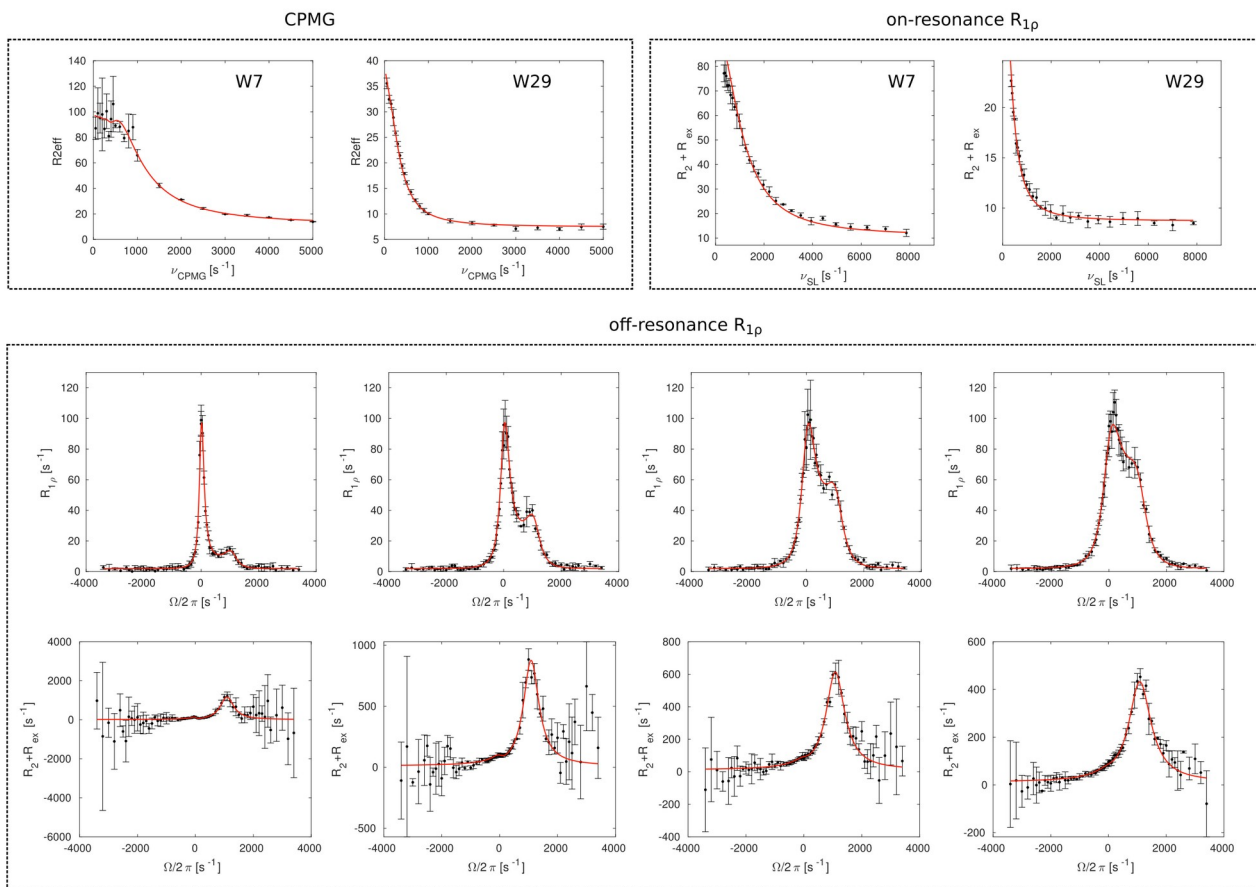

**Figure S6:** Global fit of CPMG, on-resonance  $R_{1\rho}$  and off-resonance  $R_{1\rho}$  experiments for TmCsp

**6 point-exponential fit**

$$\begin{aligned} p_A &= 96.6 \pm 0.4 \% \\ k_{\text{ex}} &= 2286 \pm 268 \text{ s}^{-1} \\ |\Delta\omega_{\text{W7}}| &= 2.62 \pm 0.18 \text{ ppm} \\ |\Delta\omega_{\text{W29}}| &= 0.51 \pm 0.02 \text{ ppm} \end{aligned}$$

**2 point-exponential fit**

$$\begin{aligned} p_A &= 96.1 \pm 1.0 \% \\ k_{\text{ex}} &= 2129 \pm 447 \text{ s}^{-1} \\ |\Delta\omega_{\text{W7}}| &= 2.36 \pm 0.24 \text{ ppm} \\ |\Delta\omega_{\text{W29}}| &= 0.47 \pm 0.04 \text{ ppm} \end{aligned}$$

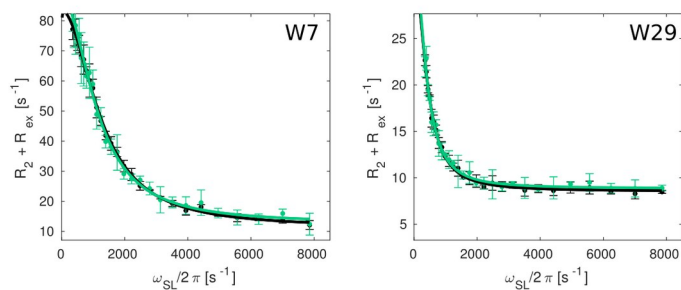

**Figure S7:** Comparison of on-resonance  $R_{1p}$  data for TmCsp derived from exponential fits with 6 points (black) and 2 points (green). The spin lock times for 6 points were 0 ms, 4 ms, 8 ms, 16 ms, 32 ms and 48 ms. The spin lock times for 2 points were 0 ms and 16 ms (W7) and 0 ms and 32 ms (W29)

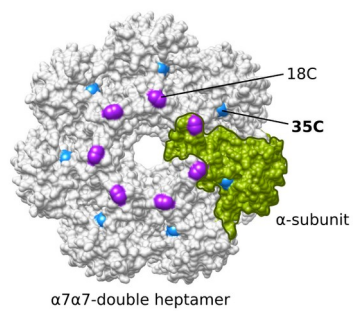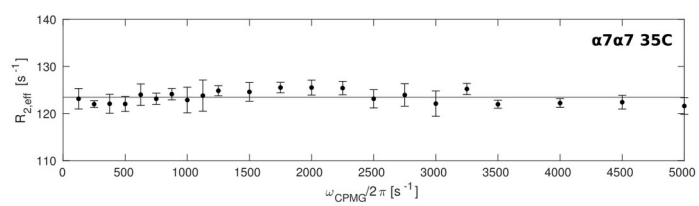

**Figure S8:**  $^{19}\text{F}$  CPMG experiment for BTFA-labeled 35C mutant of the  $\alpha 7 \alpha 7$  half-proteasome

## CPMG pulse sequence

```
/*
|
| pulse sequence for 19F CPMG
| including an anti-ringing sequence
| Time_T2 (d15) is the length of the relaxation delay
| tau_cpmg = Time_T2/4*ncyc is the time between two 180C pulses, where ncyc is the entry in the
vclist
| CPMG frequency = ncyc/Time_T2 (number of 360C 19F rotations per second)
| CPMG frequency should not go over 5 kHz (or 2 kHz on BB0)
| Jan Overbeck 2020
|
*/

/*-----
; Parameters to set
; -----*/
;p1 = 90 degree fluorine hard pulse
;plw1 = watt power for hard fluorine

#include <Avance.incl>
#include <rs.incl>
#include <Grad.incl>

/*-----
; define loop counter
; -----*/
define list<loopcounter> ncyc_cp = <$VCLIST>

"l2=0" ; loopcounter for CPMG experiments in vclist
"l5=0" ; counter for number of pi pulses in actual CPMG
"l6=0" ; counter for number of pi pulses during compensation
"l7=0" ; maximal number in vclist

"p2=p1*2"
"d11=30m"
"d13=4u"
"Time_T2=d15"

1 ze

; --- get largest entry in vclist ---
30m
"l7 = ncyc_cp.max"

/* -----
; calculation of delay
; -----*/
2 30m
;"l5 = ncyc_cp[l2]"
```

```

"l5 = trunc(ncyc_cp[l2]+0.3)"

3 30m
if "l5 > 0"
{
"Tau_cpmg_a = (Time_T2/(4*15)) - p1"
}
; -----

/*-----
; calculation number of
; heating compensation pulses
; for the next experiment
; -----*/
"l6 = 17 - 15"
; -----

/* -----
; heating compensation
; -----*/

if "l6 > 0"
{
"Tau_cpmg_c = (Time_T2/(4*16)) - p1"

4 Tau_cpmg_c
(p1*2 ph2):f1
Tau_cpmg_c
lo to 4 times l6

5 Tau_cpmg_c
(p1*2 ph2):f1
Tau_cpmg_c
lo to 5 times l6
}
else ; the recycle delay should stay constant
{
Time_T2
}
100u

/* -----
; add extra pi pulses
; to avoid starting magnetization
; -----*/
extral,100u
(p1*2 ph2):f1
100u
lo to extral times 20

```

```
/* -----  
;   this is the start  
; -----*/
```

```
6 d1  
50u UNBLKGRAD  
p16:gp1  
d16
```

```
p1 ph1
```

```
/* -----  
;   CPMG block  
; -----*/
```

```
; d20  
; (p1*2 ph2):f1  
; d20
```

```
if "l5 > 0"  
{  
7 Tau_cpmg_a  
  (p1*2 ph2):f1  
  Tau_cpmg_a  
lo to 7 times l5  
}
```

```
if "l5 > 0"  
{  
8 Tau_cpmg_a  
  (p1*2 ph2):f1  
  Tau_cpmg_a  
lo to 8 times l5  
}
```

```
; d20  
; (p1*2 ph2):f1  
; d20
```

```
/* -----  
;   anti-ringing  
; -----*/
```

```
p1 ph3
```

```
d13  
p1 ph1  
d13
```





## R1rho on-resonance pulse sequence

```
/*
|
| On-resonance 19F R1rho as pseudo-3D
| with different SL lengths read in via VPLIST
| and different SL powers read in via VALIST
|
| this pulse sequence can be used with hard pulses (default)
| or with adiabatic passages to the spin lock angle
|
| adiabatic_flg: use adiabatic passage to SL angle
|
| Pseudo-3D
| Jan Overbeck
| 2020
|
*/

/*-----
; Parameters to set
; -----*/
;p11 : adiabatic pulse length, 4ms
;spnam4 : adiabatic ramp = tanhtan90
;sp4 : adiabatic ramp power, = p125
;cnst28 : offset of SL in ppm
;p30 : maximum SL length
;p31 : heating compensation SL length
;p32 : spin lock length T_ex
;p125 : spin lock power, = sp4
;VPLIST : list of spin lock lengths
;VALIST : list of spin lock powers !in dB!

#include <Avance.incl>
#include <Grad.incl>

define list<pulse> plength = <$VPLIST>
define list<power> list1 = <$VALIST>

"p2=p1*2"
"d11=30m"
"l2=0"
"l3=0"

aqseq 312

1 ze
  "p30 = plength.max"

2 30m
/*-----
; calculate SL delays
```

```

; -----*/
"p32=length[l2]"
"p31=p30-p32"
; -----

/* -----
;   heating compensation
; -----*/
if "p31 > 0.0"
{
1u fq=100(bf ppm):f1
1u list1:f1
(p31 ph1):f1
}
; -----

d1
;50u UNBLKGRAD

/* -----
; transfer to theta and SL
; -----*/
30m
1u fq=cnst28(bf ppm):f1

if "p32 == 0.0"
{
#ifdef adiabatic_flg
1u list1:f1
(p11:sp4(currentpower) ph1):f1
#else
1u p11:f1
p1 ph4
#endif
}
else
{
#ifdef adiabatic_flg
1u list1:f1
(p11:sp4(currentpower) ph1):f1
#else
1u p11:f1
p1 ph4
#endif
1u list1:f1
(p32 ph1):f1
}
; -----

/* -----
; <-- this is the Spin Lock

```

```

; transfer back to z
; -----*/
#ifdef adiabatic_flg
    1u list1:f1
    (p11:sp5(currentpower) ph1):f1
#else
    1u p11:f1
    p1 ph5
#endif
;-----

/* -----
;   anti-ringing
; -----*/
1u p11:f1
p1 ph1
d13
p1 ph2
d13
p1 ph3
;-----

; 4u BLKGRAD
go=2 ph31
30m mc #0 to 2
F1QF(calclc(l2,1))
F2QF(calclist(list1,1))
;exit

HaltAcqu, 1m
exit

ph1=0
ph2=2 0
ph3=0 0 2 2 1 1 3 3
ph4=1
ph5=3
ph31=0 2 2 0 1 3 3 1
;ph31 = 0

;p11 : f1 channel - power level for pulse (default)
;p1  : f1 channel - 90 degree high power pulse
;p2  : f1 channel - 180 degree high power pulse
;d1  : relaxation delay; 1-5 * T1
;d11: delay for disk I/O           [30 msec]
;ns: 8 * n
;ds: 128

```

## R1rho off-resonance pulse sequence

```
/*
|
| Off-resonance 19F R1rho as pseudo-3D
|
| with different SL lengths read in via VPLIST
| and different SL offsets read in via FQ1LIST
|
| VPLIST: spin lock lengths
| FQ1LIST: offsets in Hz
|
| adiabatic_flg: use adiabatic passage to SL angle
|
| Pseudo-3D
| Jan Overbeck
| 2020
|
*/

/*-----
; Parameters to set
; -----*/
;p11 = adiabatic pulse length, 4ms
;spnam4: adiabatic ramp = tanhtan90
;sp4: adiabatic ramp power, = p125
;p125: spin lock power, = sp4
;p32: spin lock length Tex
;VPLIST: list of spin lock lengths
;FQ1LIST: list of spin lock offsets !bf hz!

#include <Avance.incl>
#include <Grad.incl>

define list<pulse> plength = <$VPLIST>
define list<frequency> fqlist = <$FQ1LIST>

"p2=p1*2"
"d11=30m"
"l2=0"
"l3=0"

"cnst28=fqlist"
"p3 = p1*pow(10,(10*log10(plw1) - 10*log10(plw25))/20)" ;90 degree SL pulse
"p6 = ((cnst28)/((1/(p3*4))))" ; spin lock offset / spin lock power
"p7 = atan(p6)" ; arc tan from this ratio = angle in rad
"p8 = p7*360/(2*PI)" ; angle in degree
"p4 = p1*(1-p8/90)" ; new pulse length

aqseq 312

1 ze
```

```

/*-----
; calculate hard pulse for offset
; dependent tip angle theta
; -----*/
2 30m
"p30 = plength.max"
"p32=plength[l2]"
"p31=p30-p32"

"cnst28=fqlist"

"p6 = ((cnst28)/((1/(p3*4))))" ; spin lock offset / spin lock power
"p7 = atan(p6)" ; arc tan from this ratio = angle in rad
"p8 = p7*360/(2*PI)" ; angle in degree
"p4 = p1*(1-p8/90)" ; new pulse length
; -----

/* -----
; heating compensation
; -----*/
if "p31 > 0.0"
{
1u fq=100(bf ppm):f1
1u pl25:f1
(p31 ph1):f1
;print "heating compensation on"
}
; -----

d1
;50u UNBLKGRAD

/* -----
; transfer to theta and SL
; -----*/

/* cycle above&below plane */
1u fq=cnst29(bf ppm):f1
1u pl1:f1
p1 ph7
p1 ph8

if "p32 == 0.0"
{
30m
#ifdef adiabatic_flg
1u fq=fqlist:f1
1u pl25:f1
(p11:sp4(currentpower) ph1):f1

```

```

#else
    1u fq=cnst29(bf ppm):f1
    1u pl1:f1
    p4 ph4
#endif
}
else
{
    30m

#ifdef adiabatic_flg
    1u fq=fqlist:f1
    1u pl25:f1
    (p11:sp4(currentpower) ph6):f1
#else
    1u fq=cnst29(bf ppm):f1
    1u pl1:f1
    p4 ph4
#endif
    1u fq=fqlist:f1
    1u pl25:f1
    (p32 ph6):f1

; <-- this is the Spin Lock

}
; -----

/* -----
; transfer back to z
; -----*/
#ifdef adiabatic_flg
    1u fq=fqlist:f1
    1u pl25:f1
    (p11:sp5(currentpower) ph6):f1
#else
    1u fq=cnst29(bf ppm):f1
    1u pl1:f1
    p4 ph5
#endif
; -----

/* cycle above&below plane BACK */
    1u fq=cnst29(bf ppm):f1
    1u pl1:f1
    p1 ph7
    p1 ph8

/* -----
; anti-ringing
; -----*/
    1u pl1:f1
    1u fq=cnst29(bf ppm):f1
    p1 ph1

```

```

d13
p1 ph2
d13
p1 ph3
; -----

; 4u BLKGRAD
go=2 ph31
30m mc #0 to 2
F1QF(calclc(l2,1))
F2QF(calclist(fqlist,1))
exit

HaltAcqu, 1m
exit

ph1=0
ph2=2 2 0 0
ph3=0 0 0 0 2 2 2 2 1 1 1 1 3 3 3 3
ph4=1 3
ph5=3 1
ph6=0 2
ph7=0
ph8=0 2
ph31=0 0 2 2 2 2 0 0 1 1 3 3 3 3 1 1

;p11 : f1 channel - power level for pulse (default)
;p1 : f1 channel - 90 degree high power pulse
;p2 : f1 channel - 180 degree high power pulse
;d1 : relaxation delay; 1-5 * T1
;d11: delay for disk I/O [30 msec]
;ns: 16 * n
;ds: > 128

```
